1 Reduced glucosinolate content in oilseed rape (*Brassica napus*  
2 L.) by random mutagenesis of *BnMYB28* and *BnCYP79F1*  
3 genes

4 Srijan Jhingan<sup>1</sup>, Hans-Joachim Harloff<sup>1</sup>, Amine Abbadi<sup>2</sup>, Claudia Welsch<sup>3</sup>, Martina Blümel<sup>3</sup>,  
5 Deniz Tasdemir<sup>3,4</sup> and Christian Jung<sup>1\*</sup>

6 <sup>1</sup> Plant Breeding Institute, Christian-Albrechts-University of Kiel, Olshausenstr. 40, 24098  
7 Kiel, Germany

8 <sup>2</sup>NPZ Innovation GmbH, Hohenlieth-Hof, 24363 Holtsee, Germany

9 <sup>3</sup>GEOMAR Centre for Marine Biotechnology (GEOMAR-Biotech), Research Unit Marine  
10 Natural Product Chemistry, GEOMAR Helmholtz Centre for Ocean Research Kiel, Am Kiel  
11 Kanal 44, 24106 Kiel, Germany

12 <sup>4</sup> Christian-Albrechts-University of Kiel, Christian-Albrechts-Platz 4, 24118 Kiel, Germany

13

14 \*Corresponding author email: [c.jung@plantbreeding.uni-kiel.de](mailto:c.jung@plantbreeding.uni-kiel.de)

15

|                                  |                                        |
|----------------------------------|----------------------------------------|
| 16 Corresponding author details: | Christian Jung                         |
| 17                               | Plant Breeding Institute               |
| 18                               | Christian-Albrechts-University of Kiel |
| 19                               | Am Botanischen Garten 1-9              |
| 20                               | D-24118 Kiel                           |
| 21                               | Germany                                |
| 22                               | Tel.: 0049 431 880 7364                |

23 **Keywords:** R2R3 MYB transcription factors, Cytochrome P450 enzymes, *Brassica napus*,  
24 glucosinolates, GSL, EMS mutagenesis, TILLING, rapeseed

## 25 Abstract

26 The presence of anti-nutritive compounds like glucosinolates (GSLs) in the rapeseed meal  
27 severely restricts its utilization as animal feed. Therefore, reducing the GSL content to  
28 <18  $\mu\text{mol/g}$  dry weight in the seeds is a major breeding target. While candidate genes  
29 involved in the biosynthesis of GSLs have been described in rapeseed, comprehensive  
30 functional analyses are missing. By knocking out the aliphatic GSL biosynthesis genes  
31 *BnMYB28* and *BnCYP79F1* encoding an R2R3 MYB transcription factor and a cytochrome  
32 P450 enzyme, respectively, we aimed to reduce the seed GSL content in rapeseed. After  
33 expression analyses on single paralogs, we used an ethyl methanesulfonate (EMS) treated  
34 population of the inbred winter rapeseed ‘Express617’ to detect functional mutations in the  
35 two gene families. Our results provide the first functional analysis by knock-out for the two  
36 GSL biosynthesis genes in winter rapeseed. We demonstrate that independent knock-out  
37 mutants of the two genes possessed significantly reduced seed aliphatic GSLs, primarily  
38 progoitrin. Compared to the wildtype Express617 control plants (36.3  $\mu\text{mol/g}$  DW), progoitrin  
39 levels were decreased by 55.3% and 32.4% in functional mutants of *BnMYB28* (16.20  $\mu\text{mol/g}$   
40 DW) and *BnCYP79F1* (24.5  $\mu\text{mol/g}$  DW), respectively. Our study provides a strong basis for  
41 breeding rapeseed with improved meal quality in the future.

## 42 Introduction

43 Oilseed rape or rapeseed (*Brassica napus* L.) is an essential oil crop, ranking as the third-  
44 largest source of vegetable oil globally (<http://www.fao.org/faostat/>). In Europe, it is grown as  
45 a winter crop, sown in autumn and flowering in the following spring after exposure to cold  
46 temperatures over winter. The seeds contain 45-50% oil with a healthy lipid profile, suitable  
47 for human consumption <sup>[1]</sup>. Moreover, it is utilized for biodiesel production. After oil  
48 extraction, the rapeseed meal (RSM) serves as a protein-rich (40%) animal feed. However,  
49 major anti-nutritive compounds like glucosinolates (GSLs) in RSM adversely affect its  
50 nutritional and commercial value <sup>[2]</sup>. Therefore, increasing yield potential, seed oil content,  
51 and improving seed meal quality are major goals for rapeseed breeding.

52 GSLs are diverse heterogeneous secondary metabolites specific to Brassicales. They are  
53 sulfur and nitrogen-containing products derived from glucose and amino acids as precursors,  
54 comprising a thioglucose and a sulfonated oxime attached to the chain elongated amino acid.  
55 Depending on their respective amino acid precursors, GSLs are categorized as aliphatic,  
56 aromatic, and indolic, originating primarily from methionine, phenylalanine, and tryptophan,  
57 respectively <sup>[3]</sup>. Biosynthesis of the three types is independently controlled by distinct gene  
58 families <sup>[4]</sup>. Roughly 130 different GSL types have been described from 16 dicot  
59 angiosperms <sup>[5]</sup>, most of which are edible plants <sup>[6; 7]</sup>. Apart from *B. napus*, *B. oleracea*  
60 (cauliflower, cabbage, broccoli, Brussels sprouts, and kale), and *B. rapa* (turnips and radish)  
61 are economically relevant vegetables rich in GSLs <sup>[8; 4]</sup>. Fifteen major GSL types have been  
62 identified in *B. napus* <sup>[6]</sup>, reaching levels as high as 60-100  $\mu\text{mol/g}$  dry weight in seeds with  
63 the methionine-derived aliphatic GSLs constituting up to 92% of all GSL types <sup>[9]</sup>. The  
64 development of rapeseed varieties with low GSL seed content was a milestone in rapeseed  
65 breeding <sup>[10]</sup>. Alleles conferring low seed GSL content were introgressed from the Polish  
66 spring variety ‘Bronowski’ <sup>[11]</sup> to develop modern rapeseed cultivars with improved seed meal

67 traits. In modern varieties, the GSL content of the RSM has been reduced to 8-15  $\mu\text{mol}$  per  
68 gram seed weight <sup>[10]</sup>.

69 GSL biosynthesis is completed in three major steps, i) chain elongation, ii) core structure  
70 formation, and iii) secondary side-chain modifications <sup>[3]</sup>. First, the addition of methylene  
71 groups results in chain elongated amino acids. Next, the addition of the sulfur group to the  
72 chain-elongated amino acids and S-glucosylation completes the core structure formation.  
73 Lastly, secondary modifications like benzylation, desaturation, hydroxylation,  
74 methoxylation, and oxidation result in distinct GSL types <sup>[4; 7]</sup>. Environmental effects  
75 combined with specific genetic mechanisms for GSL biosynthesis, regulation, transport, and  
76 storage result in varying GSL contents and diverse profiles observed across *Brassica* species  
77 <sup>[7]</sup>.

78 GSLs yield toxic by-products after enzymatic cleavage by the endogenous thioglucoside  
79 glucohydrolase called myrosinase <sup>[3]</sup>. Upon physical injury, the myrosinase is released from  
80 so-called 'myrosin cells' and comes into contact with GSLs stored in 'S-cells' <sup>[12]</sup>. Hydrolysis  
81 of GSLs generates various products like isothiocyanates (ITC), thiocyanates (SCN),  
82 epithionitriles, and nitriles (NI), many of which are known to confer defense against generalist  
83 herbivores and bacterial and fungal pathogens <sup>[13]</sup>. GSLs have been shown to confer  
84 antimicrobial properties against the phytopathogenic bacterium *Xanthomonas campestris* pv.  
85 *campestris* and the necrotrophic fungus *Sclerotinia sclerotiorum* <sup>[14]</sup>. High consumption of  
86 GSLs through the feed can result in several adverse metabolic effects in animals.  
87 Hydroxyalkenyl GSLs like epiprogoitrin and progoitrin are goitrogenic by causing  
88 inflammation of the thyroid gland <sup>[6]</sup>. Retarded growth, reduced appetite, and feed efficiency,  
89 gastrointestinal irritation, liver and kidney damage, and behavioral effects have been observed  
90 in fish <sup>[15]</sup>, poultry <sup>[16]</sup>, and higher mammals like pigs <sup>[2]</sup>. On the contrary, other GSL types like  
91 sulforaphane and indole-3-carbinol are known for their beneficial effects on human health  
92 with anti-carcinogenic properties <sup>[17]</sup>.

93  
94 A complex network of transcription factors (TFs) influenced by abiotic and biotic stimuli,  
95 hormonal and epigenetic factors controls the spatiotemporal regulation of GSL biosynthesis  
96 <sup>[18; 19]</sup>. The most notable genes controlling aliphatic GSL biosynthesis in *Arabidopsis* are  
97 R2R3 MYB transcription factors. Three TFs *MYB28*, *MYB76*, and *MYB29*, also referred to as  
98 *HIGH ALIPHATIC GLUCOSINOLATE (HAG) 1*, *2*, and *3*, respectively, have been described  
99 <sup>[18; 19]</sup>. *HAG1* has been speculated to have a 'master regulator' effect by up-regulating almost  
100 all genes involved in the core structure formation of aliphatic GSLs <sup>[19]</sup>. In *Brassica* field  
101 crops, the role of *MYB28* genes have been demonstrated to be strongly associated with  
102 aliphatic GSL biosynthesis in *B. oleraceae* <sup>[20]</sup>, *B. juncea* <sup>[21; 22; 23]</sup> and *B. rapa* <sup>[24]</sup>.  
103 The gene *CYP79F1* controls the first step of the core structure formation by converting chain  
104 elongated methionine to corresponding aldoximes <sup>[25; 26]</sup>. Its role in GSL biosynthesis has also  
105 been demonstrated in *B. juncea* <sup>[27]</sup> and *B. oleraceae* <sup>[28]</sup>.

106  
107 The transfer of knowledge from *Arabidopsis* to *B. napus* is limited and complicated due to its  
108 polyploid genome, where multiple genes with functional redundancies may exist. Several  
109 genes associated with GSLs in rapeseed have been revealed through associative  
110 transcriptomics, genome-wide association, and QTL mapping studies <sup>[29; 30; 31; 32; 33]</sup>. These  
111 studies demonstrated the significant association between biosynthesis genes *BnMYB28* and  
112 *BnCYP79F1* with high aliphatic GSL content.

113  
114 Our study aimed to reduce aliphatic GSLs in rapeseed since they are the most abundant in  
115 seeds. We analyzed the expression profiles of three *BnMYB28* and two *BnCYP79F1* paralogs

116 in rapeseed. Then, we selected *BnMYB28.C09*, *BnMYB28.A03*, *BnCYP79F1.C05* and  
117 *BnCYP79F1.A06* as candidate genes for functional studies. Using an ethyl methanesulfonate  
118 (EMS) mutagenized winter rapeseed population <sup>[34]</sup>, we detected loss-of-function mutations in  
119 *BnMYB28* and *BnCYP79F1* genes involved in the core structure biosynthesis of aliphatic  
120 GSLs. Double mutants displayed a significant reduction in the seed aliphatic GSL content.  
121 These materials could be interesting for breeding rapeseed with improved seed meal quality  
122 by achieving a further reduction of aliphatic GSLs in the seeds.

## 123 **Materials and Methods**

### 124 **Plant material and growth conditions**

125 We used the oilseed rape EMS population previously developed using an advanced inbred  
126 line (F<sub>11</sub>) of the winter rapeseed variety ‘Express’ <sup>[34]</sup>. Seeds were treated with 0.5-1.2% EMS  
127 for 12 h. The resulting M<sub>2</sub> plants were selfed to produce the corresponding M<sub>3</sub> populations.  
128 M<sub>3</sub> plants were grown in 11 cm pots under greenhouse conditions (16 h light, 20-25°C) for  
129 three weeks, with non-mutagenized plants of Express617 as controls. They were vernalized  
130 for eight weeks in a cold chamber (16 h light, 4°C). Plants selected for crossing experiments  
131 were hand-pollinated after emasculation. The inflorescences of plants chosen for selfings  
132 were isolated with plastic bags before anthesis. Plants selected for GSL measurements were  
133 grown in 11 cm pots under greenhouse conditions (16 h light, 20-25°C).

### 134 **DNA isolation and PCR**

135 For genomic DNA isolation, leaf samples were collected and lyophilized for 72 h (Martin  
136 Christ Gefriertrocknungsanlagen GmbH, Germany). Freeze-dried samples were pulverized  
137 using the GenoGrinder2010 (SPEX<sup>®</sup> SamplePrep LLC, USA) at 1,200 strokes/min. Genomic  
138 DNA was isolated using the standard CTAB method <sup>[35]</sup>. PCR was performed using paralog-  
139 specific primers as per the following conditions: 94°C for 2 min, 36 cycles of 94°C for 30s,  
140 58-66°C for 30 s - 1 min and 72°C for 1 min, followed by 72°C for 5 min for final elongation.

### 141 **Bioinformatics analyses**

142 Genomic DNA and polypeptide sequences of aliphatic GSL biosynthesis genes *AtMYB28* and  
143 *AtCYP79F1* were retrieved from The Arabidopsis Information Resource (TAIR -  
144 <https://www.arabidopsis.org/>). Using the Darmor-*bzh* rapeseed reference genome  
145 (<http://www.genoscope.cns.fr/brassicapus/>), amino acid sequences of the *Arabidopsis*  
146 orthologs were used as BLAST queries. Retrieved chromosomal locations and gene sequences  
147 of hits with the lowest e-values and >80% sequence similarity were accepted. Gene  
148 annotations (exons, 5' and 3' untranslated regions and open reading frames) for the paralogs  
149 were made using the CLC Main workbench 7 (QIAGEN<sup>®</sup> Aarhus A/S, Aarhus C, Denmark).  
150 Sequence alignments were generated for the genomic DNA, cDNA, and amino acid  
151 sequences of the retrieved genes. Conserved and functional domain analyses were done using  
152 the NCBI Conserved Domain Database.

### 153 **Gene expression analysis by RT-qPCR**

154 The winter-type rapeseed inbred line Express617 was used for expression studies. Seeds were  
155 sown in 11 cm pots under greenhouse conditions (16 h light, ~25°C). After three weeks,  
156 plants were vernalized (16 h light, 4°C) for eight weeks and then transferred to greenhouse  
157 conditions (16 h light, ~25°C) and their positions were randomized twice a week. Flowers  
158 were hand-pollinated and marked with pollination dates. Leaves and seeds were sampled at

159 15, 25, 35, and 45 days after pollination (DAP). 50-100 mg of fresh weight tissues were  
160 collected from five biological replicates at the four developmental stages. Tissues were frozen  
161 in liquid nitrogen and stored at -70°C. Frozen tissues were pulverized in 2 ml reaction tubes  
162 with three 3 mm steel balls using the GenoGrinder2010 (SPEX® SamplePrep LLC, USA) at  
163 1,200 strokes/min in 1 min intervals. RNA was isolated using the peqGold Plant RNA Kit  
164 (PEQLAB Biotechnologie GmbH, Germany) following the manufacturer's instructions. RNA  
165 quality was assessed with a NanoDrop2000 spectrophotometer (ThermoFisher Scientific,  
166 USA) and by agarose gel electrophoresis (1.5% agarose, 100 V, 30 min). The RNase-free  
167 DNase kit (ThermoFisher Scientific, USA) was used to treat samples with DNaseI to remove  
168 contaminating gDNA. cDNA was synthesized with 1 µg RNA using the First Strand cDNA  
169 Kit (ThermoFisher Scientific, USA). RT-qPCR was performed on the Bio-Rad CFX96 Real-  
170 Time System (Bio-Rad Laboratories GmbH, Germany) using paralog-specific primers  
171 (Supplementary Table 1). The relative expression was calculated according to the  $\Delta\Delta C_q$   
172 method for each paralog normalized against the two reference genes *BnGAPDH* and  
173 *BnACTIN*. The relative expression levels of each candidate paralogs were determined as a  
174 mean of five biological replicates with three technical replicates each.

## 175 **Conventional gel-based detection of EMS induced mutations**

176 We screened 3,840 M<sub>2</sub> plants from the EMS-mutagenized winter rapeseed Express617  
177 population<sup>[34]</sup> to detect EMS-induced mutations in *BnMYB28* and *BnCYP79F1* paralogs.  
178 Paralog-specific primers were designed for the selected paralogs using the Darmor-*bzh*  
179 reference genome (Supplementary Table 2). Amplicons were evaluated for specificity using  
180 agarose gel electrophoresis (1% agarose, 100V, 10 min) and Sanger sequencing for validation.  
181 Using the protocol described by Till et al. (2006), we amplified M<sub>2</sub> DNA pools using 5' end  
182 infrared labeled probes DY-681 and DY-781 (Biomers, Ulm, Germany) for forward and  
183 reverse primers (100 pmol/µl), respectively. The resulting amplicons were processed for  
184 heteroduplex formation prior treatment with CELI nuclease (15 min at 45°C). 5 µl of 50 mM  
185 EDTA (pH 8.0) was added to terminate the digestion reaction. After digestion, samples were  
186 purified on Sephadex G-50 Fine columns (GE Healthcare, USA). 4 µl of formamide-  
187 containing dye (96% deionized formamide, 5 ml 0.25 M EDTA, 0.01% bromophenol blue)  
188 was added to each sample. Samples were concentrated to ~20% of the original volume after  
189 incubation at 95°C for 30 min. 0.65 µl concentrated samples were separated on  
190 polyacrylamide gels using the LI-COR 4300 DNA Analyzer (LI-COR Biosciences, USA)  
191 using standard parameters (1,500 V, 40 mA, and 40 W for 4 h 15 min). The GelBuddy  
192 imaging software<sup>[37]</sup> was used to analyze gel images and identify single M<sub>2</sub> mutants. Standard  
193 PCR was done to amplify regions harboring the expected single mutations using the gDNA  
194 isolated from single M<sub>2</sub> plants. Amplicons were Sanger sequenced to validate the detected  
195 EMS-induced point mutations. Mutation effects conferred by SNPs on the polypeptide level  
196 were then characterized. Mutation frequencies (F) were estimated following the formula given  
197 by Harloff et al. (2012):

$$F [1 \text{ per kb}] = 1 / \frac{(\text{amplicon size} - 100) \times \text{number of M1 plants}}{\text{Number of screened mutations} \times 1000}$$

## 198 **Mutant genotyping**

199 Using standard PCR, primers flanking detected EMS mutations were used for amplification  
200 (Supplementary Table 2). PCR specificity was checked using agarose gel electrophoresis (1%,  
201 100V, 12-30 min). Plants were genotyped by Sanger sequencing of PCR fragments to confirm  
202 the presence of EMS mutations.

## 203 **Glucosinolate measurements**

204 GSLs in leaves and mature seeds were measured in two ways. Quantitative measurements  
205 were performed with an enzymatic assay using myrosinase/thioglucosidase from *Sinapis alba*  
206 (Sigma-Aldrich CAS-No. 9025-38-1) and a D-Glucose Assay Kit (glucose  
207 oxidase/peroxidase; GOPOD assay) (Megazyme International, Ireland). A qualitative  
208 assessment of GSL profiles was done using high-performance liquid chromatography  
209 (HPLC). 5-7g fresh leaves (~15 days after pollination) and 200-600 mg mature seeds were  
210 sampled in 50 ml and 2 ml sample tubes, respectively. Sampled leaves were lyophilized for 72  
211 h (Martin Christ Gefriertrocknungsanlagen GmbH, Germany). Freeze-dried leaf samples and  
212 mature seeds (BBCH 89) were pulverized using the GenoGrinder2010 (SPEX® SamplePrep  
213 LLC, USA) at 1,400 strokes/min in 4-5 1 min intervals. Using the hot methanol (70%)  
214 extraction method, ~200 mg milled samples were used to prepare crude extracts following the  
215 protocol of Fiebig and Arens (1992) and then stored at -20°C.

216 For quantitative measurements, crude extracts (4 ml) were passed through 0.5 ml DEAE-  
217 Sephadex A-25 columns (GE Healthcare, USA). The bound GSL was digested on the column  
218 for 18 h at room temperature with ~0.8U myrosinase/thioglucosidase. After digestion,  
219 columns were washed twice with 0.5 ml deionized distilled water (ddH<sub>2</sub>O) for elution of  
220 glucose. The eluate was shock frozen and freeze-dried for ~72 h. The residue was dissolved in  
221 100 µl ddH<sub>2</sub>O and a 5-40 µl aliquot was used for analysis in duplicates using the D-Glucose  
222 Assay Kit (Megazyme International, Ireland) following the manufacturer's instructions.

223 For qualitative analyses, GSL in 1 ml crude extracts were bound on 250 µl DEAE-Sephadex  
224 A-25 columns and digested on the column for 18 h at room temperature with 18U sulfatase  
225 H1 enzyme (Merck KGaA, Germany). Desulfoglucosinolates were eluted twice with 1 ml  
226 ddH<sub>2</sub>O. 10-50 µl aliquots were separated on a 250 x 4.6 mm Lichrosorb 5µ column (Merck  
227 KGaA, Germany) as described by Fiebig and Arens (1992) using a Shimadzu2000 HPLC-  
228 system. GSLs were quantified by their absorbance at 229 nm and identified by retention time  
229 using commercially available GSL standards (PhytoLab GmbH, Germany). For each  
230 commercially available standard, an individual calibration curve was used for quantification  
231 (Supplementary Table 3).

232 To validate peak identity and quantification, a test set of 8 seed extract samples (concentration  
233 8 mg/ml) from HPLC measurements were analyzed for cross-referencing on an LC-MS  
234 system consisting of a VWR Hitachi Elite LaChrom (Hitachi High-Technologies Corporation,  
235 Japan), L-2450 DAD detector, L-2300 Column Oven, L-2200 Autosampler and L-2130 Pump  
236 connected to an iontrap esquire4000 (Bruker Daltonics, Germany). The chromatography was  
237 carried out on a Synergi 4 µ Polar-RP column (80 Å, 250 x 4.6 mm, Phenomenex, Torrance,  
238 USA). The mobile phase consisted of H<sub>2</sub>O (Milli-Q grade, Arium® Water Purification  
239 Systems, Sartorius, Germany) with 0.1% formic acid (Promochem, ScienTest-BioKEMIX  
240 GmbH, Germany) as eluent A, and acetonitrile (LC-MS-grade, AppliChem, Germany) as  
241 eluent B [39]. The following chromatographic conditions were applied: elution starting from  
242 0% B 0-2 min isocratic, gradient elution from 2-12 min to 60% B, 12-14 min isocratic elution  
243 at 60% B, gradient elution from 14-15 min to 0% B, 15-23 min isocratic re-equilibration at  
244 0% B, 1 ml/min flow, oven temperature 30°C, wavelength 229 nm, injection volume 50 µl.  
245 The iontrap settings were as follows: negative mode, capillary voltage: 4000 V, nebulizer:  
246 50 psi, dry gas (nitrogen): 10.0 L/min, dry temperature: 365°C, scan range: 100-1200 m/z [39].

247 Major sample peaks were quantified at 229 nm using a VWR Hitachi Chromaster (Hitachi  
248 High-Technologies Corporation, Japan) consisting of a 5430 DAD detector, 5310 Column

249 Oven, 5260 Autosampler, and a 5110 Pump. The chromatographic conditions were applied as  
250 described for the LC-MS system, except that no formic acid was added to eluent A. The  
251 injection volume was 30  $\mu$ l.

## 252 **Statistical analyses**

253 For expression studies, significantly expressed paralogs were identified by performing an  
254 ANOVA ( $p < 0.05$ ) for the relative expression levels of each paralog. Mean relative  
255 expressions from five biological replicates were compared across the four sampling points 15,  
256 25, 35, and 45 DAP in seeds and leaves. The LSD test ( $\alpha \leq 0.05$ ) was performed to generate  
257 statistical groups using the ‘Agricolae’ package in R. The standard error of the mean was  
258 calculated across the five biological replicates with three technical replicates each.

259 In GSL determination experiments, the total GSL content using the D-Glucose Assay Kit and  
260 the contents of individual GSL compounds using HPLC were evaluated for statistical  
261 significance across the analyzed samples. An ANOVA ( $p < 0.05$ ) was performed for the  
262 analysis of the variance along with an LSD test ( $\alpha \leq 0.05$ ) for statistical grouping using the  
263 ‘Agricolae’ package in R. The standard error of the mean was calculated across five  
264 biological replicates.

## 265 **Results**

### 266 **Identification of *MYB28* and *CYP79F1* genes in the oilseed rape genome**

267 For identification of possible paralogs in rapeseed, the Darmor-*bzh* reference genome  
268 (<https://www.genoscope.cns.fr/brassicnapus/>) was searched for *MYB28* and *CYP79F1* genes  
269 using polypeptide sequences from *A. thaliana* genes *AtMYB28* (AT5G61420) and *AtCYP79F1*  
270 (AT1G16410) as queries. Based on the lowest e-values and highest sequence similarities  
271 (>80%), three and two paralogs were detected for *BnMYB28* and *BnCYP79F1*, respectively  
272 (Table 1, Supplementary Figure 1). The polypeptides of *BnMYB28* and *BnCYP79F1* shared a  
273 similarity of 85% and 86%, respectively with their corresponding *Arabidopsis* orthologs. We  
274 aligned the polypeptide sequences of the candidate paralogs to identify conserved functional  
275 domains characteristic for the R2R3 MYB transcription factor and cytochrome P450 gene  
276 families (Supplementary Figure 2). In line with previous reports, the highly conserved DNA  
277 binding R2 and R3 domains specific to the subgroup 12 MYB transcription factors and the  
278 nuclear localization signal with the ‘LKKRL’ amino acid residues were present across protein  
279 sequences of all three *BnMYB28* paralogs<sup>[40]</sup>. The paralog *BnMYB28.C09* was annotated in a  
280 truncated form in the Darmor-*bzh* reference genome but harbored all conserved domains  
281 required for gene activity. The protein sequences of both *BnCYP79F1* paralogs possessed five  
282 conserved domains characteristic to the family of cytochrome P450 enzymes, including a  
283 ‘heme’ group speculated to act as the catalytic domain<sup>[25]</sup>.

284  
285  
286  
287  
288  
289  
290  
291  
292  
293

294 **Table 1:** Features of *BnMYB28* and *BnCYP79F1* paralogs with homology to the Arabidopsis genes *AtMYB28*  
 295 (*AT5G61420*) and *AtCYP79F1* (*AT1G16410*) in oilseed rape.

| Arabidopsis gene <sup>[1]</sup> | <i>B. napus</i> paralogs <sup>[a]</sup> | <i>B. napus</i> gene name | Chromosome         | Gene length (bp) | Coding region (bp) | Polypeptide length | Shared protein identity with the Arabidopsis ortholog |
|---------------------------------|-----------------------------------------|---------------------------|--------------------|------------------|--------------------|--------------------|-------------------------------------------------------|
|                                 | <i>BnaA03g40190D</i>                    | <i>BnMYB28.A03</i>        | A03                | 2,018            | 987                | 328                | 85.2%                                                 |
| <i>AtMYB28</i>                  | <i>BnaCnnng43220D</i>                   | <i>BnMYB28.Cnn</i>        | Cnn <sup>[b]</sup> | 2,072            | 1,011              | 337                | 87.1%                                                 |
|                                 | <i>BnaC09g05300D</i>                    | <i>BnMYB28.C09</i>        | C09                | 1,072            | 420                | 140                | 82.8%                                                 |
|                                 | <i>BnaC05g12520D</i>                    | <i>BnCYP79F1.C05</i>      | C05                | 2,397            | 1,623              | 540                | 86.1%                                                 |
| <i>AtCYP79F1</i>                | <i>BnaA06g11010D</i>                    | <i>BnCYP79F1.A06</i>      | A06                | 2,380            | 1,623              | 540                | 85.8%                                                 |

296 [1] *A. thaliana* gene sequences retrieved from The Arabidopsis Information Resource (TAIR).

297 [a] Sequence analysis of orthologs and paralogs in oilseed rape are based on gene models described in the Darmor-  
 298 *bzh* reference genome (Genoscope).

299 [b] Not anchored to a specific *B. napus* chromosome.

### 300 **Expression profiles of *BnMYB28* and *BnCYP79F1* genes reveal putative** 301 **functional paralogs**

302 For knock-out studies, we aimed to select highly expressed paralogs. Therefore, we  
 303 investigated the expression profiles of *BnMYB28* and *BnCYP79F1* genes in the German  
 304 winter-type inbred rapeseed Express617 by RT-qPCR. The relative expression of candidate  
 305 genes was analyzed in leaves and seeds at growth stages 15, 25, 35, and 45 days after  
 306 pollination (DAP).

307 The two *BnMYB28* paralogs *BnMYB28.C09* and *BnMYB28.A03* showed a thousand fold  
 308 higher relative expression in leaves than seeds across all growth stages (Figure 1).  
 309 *BnMYB28.C09* was the most highly expressed paralog in leaves. However, expression sharply  
 310 declined 15 DAP and remained low during later stages of seed development (25-45 DAP).  
 311 The expression of *BnMYB28.A03* was consistently lower across all growth stages in the  
 312 leaves, accounting for ~17% of the expression levels of *BnMYB28.C09*. In leaves  
 313 *BnMYB28.Cnn* expression was not detectable, whereas measurable expression was detected at  
 314 later stages towards seed maturity. Conclusively, *BnMYB28.C09* and *BnMYB28.A03* were  
 315 selected for further studies as putative functional paralogs because they were significantly  
 316 expressed in the leaves.

317  
 318 Similar to *BnMYB28*, *BnCYP79F1* paralogs were significantly more expressed in the leaves  
 319 than seeds, attaining a hundredfold higher expression level. There was also a significant  
 320 difference between the two *BnCYP79F1* paralogs in leaves as the expression of  
 321 *BnCYP79F1.C05* was more than tenfold higher than *BnCYP79F1.A06* (Figure 1). In contrast,  
 322 the expression levels of *BnCYP79F1.A06* was higher than *BnCYP79F1.C05* in seeds. In the  
 323 early stages of seed development (15 DAP), *BnCYP79F1.A06* was tenfold higher expressed  
 324 than *BnCYP79F1.C05*, followed by a drastic decrease as the plants matured. In leaves, the  
 325 expression of *BnCYP79F1.C05* sharply increased between 25 and 35 DAP and then decreased  
 326 as the plants approached maturity. Interestingly, *BnMYB28* and *BnCYP79F1* genes displayed



327 opposite expression patterns in the leaves. While *BnMYB28* was highly expressed at early  
 328 stages (15 DAP) followed by a sharp decline, *BnCYP79F1* expression increased during later  
 329 stages (25-35 DAP)

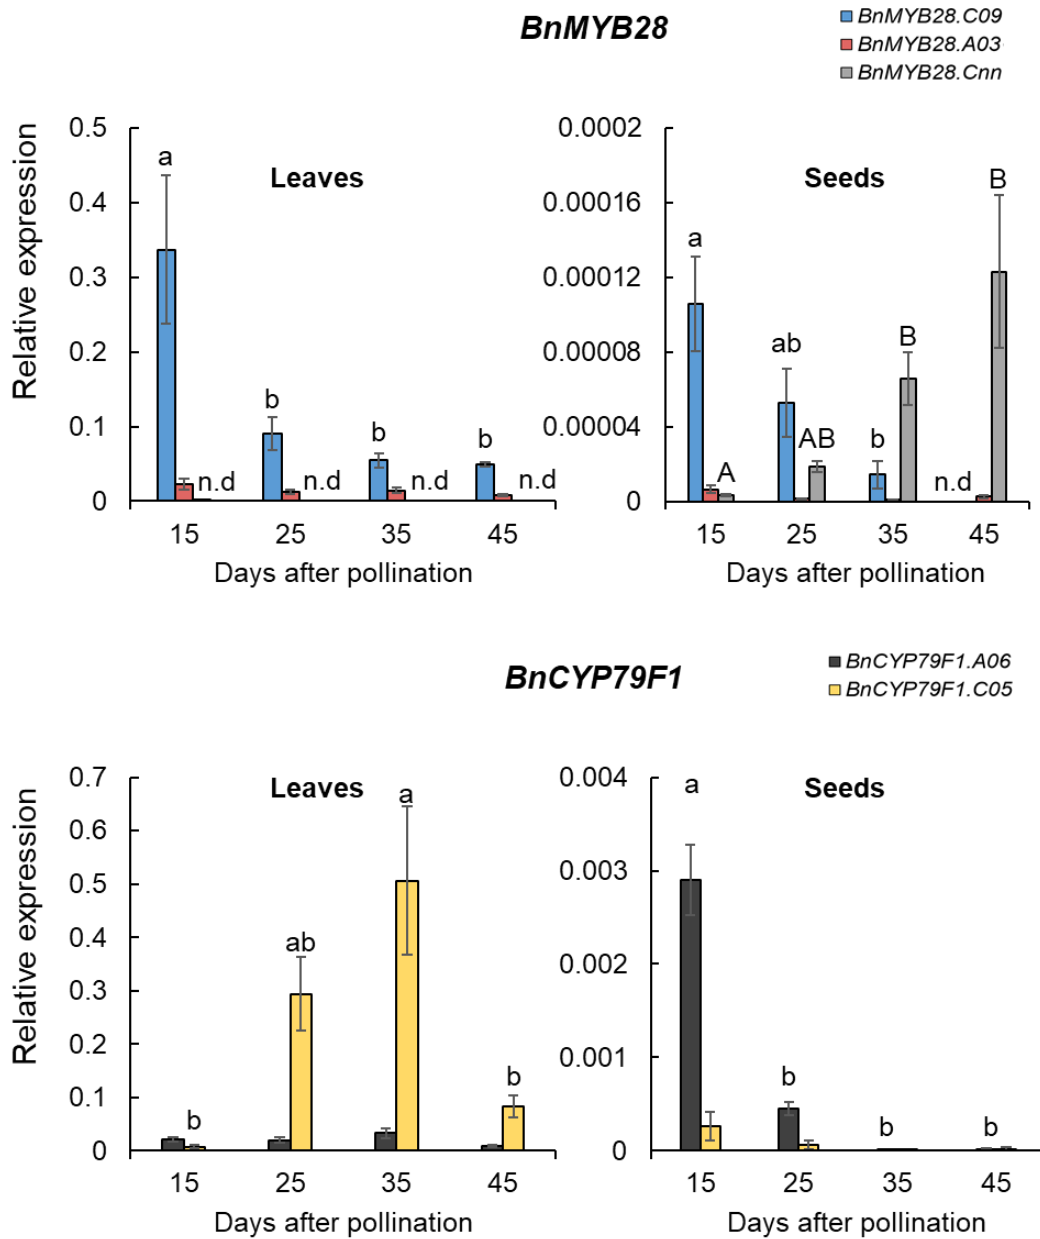

330

331 **Figure 1:** Relative expression of three *BnMYB28* and two *BnCYP79F1* paralogs in the winter-type oilseed rape  
 332 Express617. Plants were grown in the greenhouse (20-25°C and 16 h light) after vernalization (4°C, 16 h light for  
 333 8 weeks). For each gene, leaves and seeds were sampled from five plants 15, 25, 35, and 45 days after pollination  
 334 (five biological replicates). RT-qPCR was performed with three independent samples of each plant (three technical  
 335 replicates) and the relative expression was calculated after normalization with two reference genes, *BnACTIN* and  
 336 *BnGAPDH*. Error bars represent the standard error of the mean of five biological replicates, with three technical  
 337 replicates each. Statistical significance was calculated with an ANOVA ( $p < 0.05$ , linear model, grouping: Tukey  
 338 test) using the R package “Agricolae”. Alphabets over bars represent statistical groups. n.d: not detectable.

339 **EMS-induced mutants for selected *BnMYB28* and *BnCYP79F1* paralogs**

340 We screened the M<sub>2</sub> population for EMS-induced mutations in four genes (*BnMYB28.C09*,  
341 *BnMYB28.A03*, *BnCYP79F1.C05*, and *BnCYP79F1.A06*) using a conventional  
342 polyacrylamide gel-based assay. We detected 35 and 43 EMS-induced mutations in *BnMYB28*  
343 and *BnCYP79F1* paralogs, respectively (Supplementary Table 4), which could be classified  
344 into 6 nonsense, 50 missense, and 22 silent mutations (Figure 2). No splice site mutations  
345 were detected. Mutation frequencies ranged between 1/31.5-1/67.0 kb across the two gene  
346 families. On average, a frequency of one EMS-induced mutation per 43.6 kb was detected  
347 (Supplementary Table 5), which is in the range of estimations made by former studies on this  
348 EMS population [41; 42; 43; 44; 45; 46]. Both *BnMYB28* nonsense mutations were located within the  
349 conserved DNA binding R2 domain. Additionally, seven missense mutations were also  
350 detected within the R2 domain. We found one nonsense mutation in the *BnCYP79F1.C05*  
351 paralog, while none could be detected for *BnCYP79F1.A06*. A missense mutation conferring a  
352 minor change to the protein folding due to the exchange of lysine with glutamic acid was  
353 selected. For further studies, we chose all M<sub>3</sub> plants with nonsense mutations plus the  
354 *BnCYP79F1.A06* missense mutant. For ease of understanding, we assigned unique one-letter  
355 codes to wildtype and mutant alleles (Table 2).

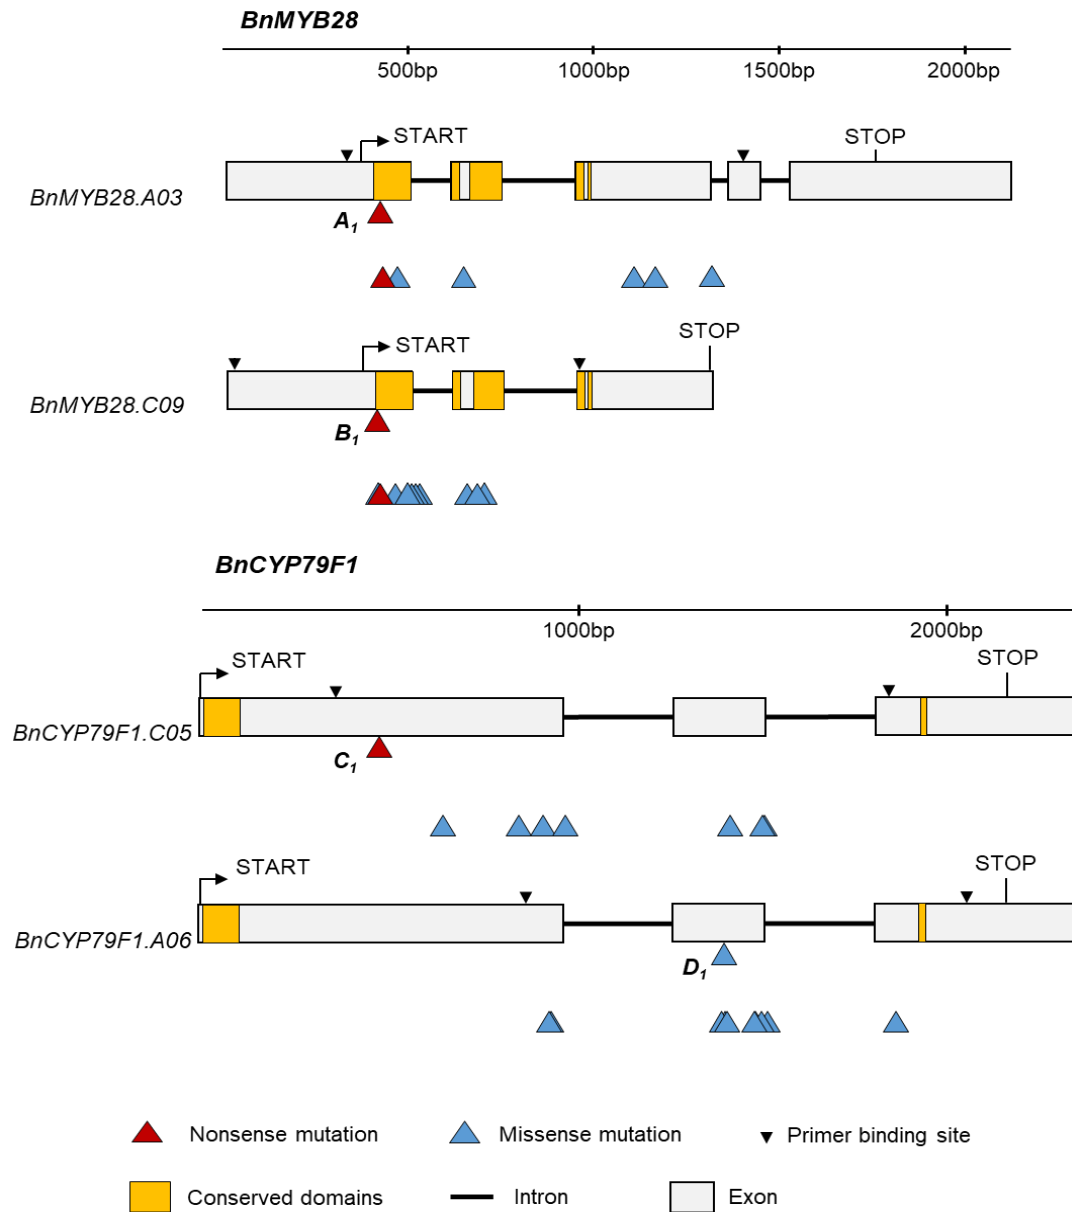

356

357 **Figure 2:** Structure of four *BnMYB28* and *BnCYP79F1* genes and EMS-induced nonsense and missense mutations.  
 358 Allele identities are given next to the mutation site for those mutations used for further studies (refer to Table 2  
 359 for all allele codes). Regions coding for functional and conserved domains characteristic to the gene families are  
 360 marked in orange boxes. START and STOP represent the translation start and stop sites, respectively. For  
 361 *BnCYP79F1*, the 5' untranslated regions are not defined on the Darmor-*bzh* reference genome.

362 Due to high functional redundancies of genes in the polyploid oilseed rape genome, single  
 363 mutations rarely have a phenotypic effect. Therefore, we crossed single mutants of  
 364 *BnMYB28.C09* and *BnMYB28.A03* and then separately for *BnCYP79F1.C05* and  
 365 *BnCYP79F1.A06* to produce distinct double mutants of *BnMYB28* and *BnCYP79F1*,  
 366 respectively. We genotyped M<sub>3</sub> plants by generating PCR fragments encompassing the  
 367 expected mutations (Supplementary Table 2) and confirmed single M<sub>3</sub> mutants by Sanger  
 368 sequencing of the PCR fragments (Supplementary Table 6). Mutant plants were selected for  
 369 crossing experiments (Supplementary Table 7). *BnMYB28* and *BnCYP79F1* M<sub>3</sub> single  
 370 mutants were crossed with each other (referred to as 'M<sub>3</sub>xM<sub>3</sub>'). F<sub>1</sub> offspring were selfed to  
 371 generate the F<sub>2</sub> populations 200527 (Supplementary Figure 3A) and 200529 (Supplementary  
 372 Figure 3B), respectively.

373 **Table 2:** Allele codes assigned to EMS mutants and wildtype plants selected as crossing parents in this study.  
 374 Single mutants were selected as crossing parents to combine single mutations for enhanced phenotypic effects. For  
 375 each of the analyzed paralogs, mutants and wildtype parents were assigned unique allele codes.

|                               | Gene name            | Mutation position on gDNA <sup>[1]</sup> | Allele code          | cDNA change <sup>[1]</sup> | AA change | Mutation type | M <sub>3</sub> seed code <sup>[2]</sup> |
|-------------------------------|----------------------|------------------------------------------|----------------------|----------------------------|-----------|---------------|-----------------------------------------|
| M <sub>3</sub> single mutants | <i>BnMYB28.C09</i>   | G51A                                     | <i>A<sub>l</sub></i> | G51A                       | W17*      | Nonsense      | 190623                                  |
|                               | <i>BnMYB28.A03</i>   | G50A                                     | <i>B<sub>l</sub></i> | G50A                       | W17*      | Nonsense      | 190625                                  |
|                               | <i>BnCYP79F1.C05</i> | C424T                                    | <i>C<sub>l</sub></i> | C424T                      | E142*     | Nonsense      | 190628                                  |
|                               | <i>BnCYP79F1.A06</i> | G1379A                                   | <i>D<sub>l</sub></i> | G1090A                     | E364K     | Missense      | 190630                                  |
| Wildtype Express617           | <i>BnMYB28.C09</i>   |                                          | <i>A<sub>e</sub></i> |                            |           |               |                                         |
|                               | <i>BnMYB28.A03</i>   |                                          | <i>B<sub>e</sub></i> |                            |           |               |                                         |
|                               | <i>BnCYP79F1.C05</i> | n.a                                      | <i>C<sub>e</sub></i> |                            |           | n.a           |                                         |
|                               | <i>BnCYP79F1.A06</i> |                                          | <i>D<sub>e</sub></i> |                            |           |               |                                         |

376 [1] Position relative to the translation start site.

377 [2] M<sub>3</sub> seed codes corresponding to screened M<sub>2</sub> mutants.

378 Non-mutated wildtype alleles from Express617 are represented with the 'e' suffix in subscript.

379 \*Premature stop codon, n.a: not applicable.

### 380 Mutations in *BnMYB28* and *BnCYP79F1* confer a significant reduction in the 381 aliphatic GSL content in seeds

382 We investigated the effect of EMS-induced mutations in *BnMYB28* and *BnCYP79F1* genes by  
 383 quantitative and qualitative analysis of GSLs. Segregating individuals from two F<sub>2</sub>  
 384 populations (200527 and 200529) were analyzed (Supplementary Table 7) along with non-  
 385 mutagenized Express617 plants as controls. F<sub>2</sub> populations 200527 and 200529 originated  
 386 from M<sub>3</sub>xM<sub>3</sub> crosses of *BnMYB28* and *BnCYP79F1* single mutants, respectively.

387 First, F<sub>2</sub> plants from the two populations were genotyped by Sanger sequencing. Four  
 388 genotypes per population were selected for phenotypic studies. In F<sub>2</sub> populations 200527 and  
 389 200529, plants homozygous for the wildtype alleles (*A<sub>e</sub>A<sub>e</sub>B<sub>e</sub>B<sub>e</sub>* and *C<sub>e</sub>C<sub>e</sub>D<sub>e</sub>D<sub>e</sub>*), homozygous  
 390 for one mutant allele (*A<sub>l</sub>A<sub>l</sub>B<sub>e</sub>B<sub>e</sub>* or *A<sub>e</sub>A<sub>e</sub>B<sub>l</sub>B<sub>l</sub>* and *C<sub>l</sub>C<sub>l</sub>D<sub>e</sub>D<sub>e</sub>* or *C<sub>e</sub>C<sub>e</sub>D<sub>l</sub>D<sub>l</sub>*), and homozygous  
 391 for two mutant alleles (*A<sub>l</sub>A<sub>l</sub>B<sub>l</sub>B<sub>l</sub>* and *C<sub>l</sub>C<sub>l</sub>D<sub>l</sub>D<sub>l</sub>*) were selected for phenotyping  
 392 (Supplementary Figure 3A and 3B).

393 In general, a significantly higher GSL content was observed in seeds than in leaves (Figure 3).  
 394 In seeds of *BnMYB28* double mutants (F<sub>2</sub> population 200527), the GSL content was  
 395 significantly ( $p < 0.05$ ) reduced to 23.41 μmol/g DW compared to F<sub>2</sub> plants homozygous for  
 396 the wildtype alleles (47.28 μmol/g DW) and the non-mutagenized Express617 control plants  
 397 (49.73 μmol/g DW), which corresponds to a significant GSL reduction by 50.5% and 52.9%,  
 398 respectively (Figure 3). No significant differences were observed between the leaves of  
 399 *BnMYB28* double mutants (0.96 μmol/g DW) and the Express617 control (0.86 μmol/g DW).  
 400 Also, the *BnCYP79F1* double mutants (F<sub>2</sub> population 200529) showed reduced seed GSL  
 401 contents by 27.9% and 26.9% compared to the Express617 controls and the F<sub>2</sub> plants  
 402 homozygous for the wildtype alleles, respectively. However, the difference was not  
 403 statistically significant ( $p < 0.05$ ). GSL contents in leaves varied between 0.9-1.5 μmol/g DW

404 in the *BnCYP79F1* double mutants and 0.7-1.5  $\mu\text{mol/g DW}$  in the wildtype F<sub>2</sub> plants without  
 405 statistically significant differences between the genotypes.

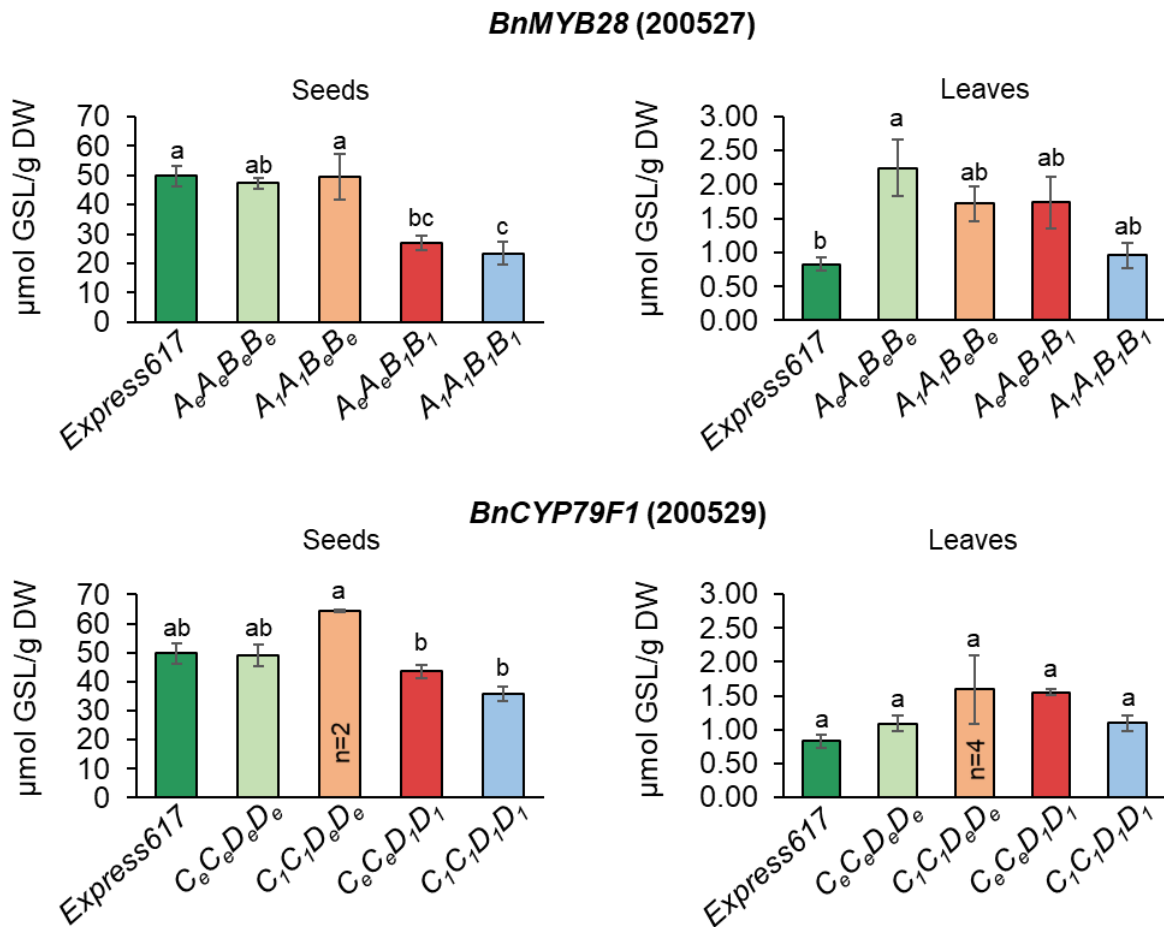

406  
 407 **Figure 3:** Seed and leaf glucosinolate contents in populations segregating for *BnMYB28* and *BnCYP79F1*  
 408 mutations. F<sub>2</sub> populations 200527 and 200529 segregating for *BnMYB28* and *BnCYP79F1* mutations, respectively,  
 409 originated from M<sub>3</sub>xM<sub>3</sub> crosses. Homozygous F<sub>2</sub> double mutants ( $A_1A_1B_1B_1$  and  $C_1C_1D_1D_1$ ) were analyzed together  
 410 with homozygous single mutants ( $A_1A_1B_eB_e$ ,  $A_eA_eB_1B_1$ ,  $C_1C_1D_eD_e$ , and  $C_eC_eD_1D_1$ ), non-mutagenized Express617  
 411 and F<sub>2</sub> plants homozygous for the wildtype alleles ( $A_eA_eB_eB_e$  and  $C_eC_eD_eD_e$ ). Leaf samples were taken 15 days  
 412 after pollination and mature seeds (BBCH89) were used for glucosinolate determination. Error bars represent the  
 413 standard error from five plants (n=5) per genotype with two exceptions mentioned in the figure. An ANOVA ( $p$   
 414 < 0.05) was performed and the Tukey test ( $p$  < 0.05) was done for grouping. Different alphabets above error bars  
 415 represent groups based on significance. All genotypes are as per designated allele codes given in Table 2.

416 Then, individual seed GSL profiles were analyzed in the same plants as performed for total  
 417 GSL determinations. Single GSLs were identified by retention time and co-chromatography  
 418 with commercial standards and quantified using individual calibration curves (Supplementary  
 419 Table 3). Although the estimation of total GSL by summing up the major compounds  
 420 identified by HPLC yielded generally higher values than the enzymatic method, the results  
 421 did not show significant differences between mutants (Supplementary Figure 4). This  
 422 suggested that our data evaluation for single GSL identification via HPLC and the sum of  
 423 their concentrations were in line with the total GSL content estimated with the enzymatic test.  
 424 Eight seed sample extracts were analyzed by LC-MS (Iontrap) to confirm the peak identity.  
 425 All previously calibrated glucosinolates were confirmed. Moreover, two additional aliphatic  
 426 glucosinolates (gluconapoleiferin and glucoalysin) and the major indolic glucosinolate 4-  
 427 hydroxyglucobrassicin, for which no calibration standards were available, could be identified

428 and were quantified based on their UV absorbance at 229 nm using sinigrin (as internal  
429 standard) and calibration factors from the literature [38].

430 In the seeds, we identified nine aliphatic GSLs (glucoiberin, progoitrin, epiprogoitrin,  
431 sinigrin, glucoraphanin, gluconapoleiferin, glucoalyssin, gluconapin, and glucobrassicinapin)  
432 in varying quantities and four other GSLs (4-hydroxyglucobrassicin, glucotropaeolin,  
433 glucobrassicin, and gluconasturtiin) in smaller amounts. In line with previous reports [9], the  
434 aliphatic GSL comprised the major portion (93.9%) of the seed GSL content in all genotypes  
435 studied here (Figure 4).

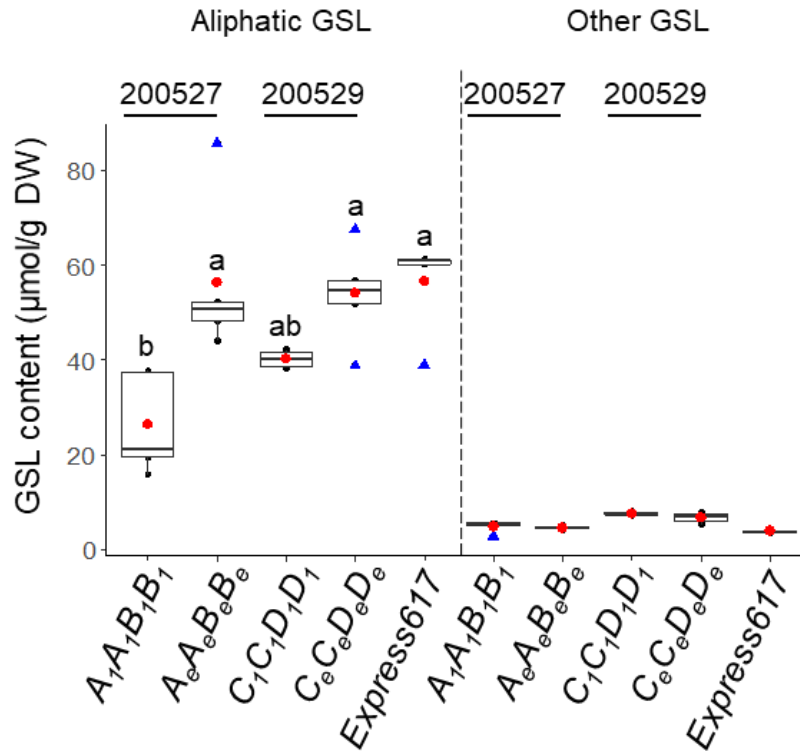

436

437 **Figure 4:** Analysis of major glucosinolate types in mature seeds of *BnMYB28* and *BnCYP79F1* mutants. Aliphatic  
438 and other GSL types measured from homozygous *BnMYB28* (genotype A<sub>1</sub>A<sub>1</sub>B<sub>1</sub>B<sub>1</sub>, seed code 200527) and  
439 *BnCYP79F1* (genotype C<sub>1</sub>C<sub>1</sub>D<sub>1</sub>D<sub>1</sub>, seed code 200529) originating from M<sub>3</sub>xM<sub>3</sub> crosses. F<sub>2</sub> plants homozygous for  
440 the wildtype alleles (A<sub>e</sub>A<sub>e</sub>B<sub>e</sub>B<sub>e</sub> and C<sub>c</sub>C<sub>c</sub>D<sub>e</sub>D<sub>e</sub>) and non-mutated Express617 were used as controls. Plants were  
441 grown in the greenhouse. Mature seeds were harvested at BBCH89. GSL profiles for aliphatic and other GSL  
442 types (phenolic and indolic) were analyzed using HPLC. GSL content was calculated as µmol/g dry weight (DW).  
443 Individual and mean values are marked in black and red dots, respectively. Blue triangles represent outliers. Error  
444 bars represent the standard error of the mean from five biological replicates. An ANOVA test ( $p < 0.05$ ) was  
445 performed and significant differences between groups were calculated by a Tukey test ( $p < 0.05$ ). Different  
446 alphabets (a-d) above error bars represent groups based on significance. All genotypes are as per designated allele  
447 codes given in Table 2.

448 In *BnMYB28* F<sub>2</sub> double mutants (population 200527), the progoitrin concentrations in seeds  
449 were 55.3% lower than in the Express617 controls (reduced from 36.32 µmol/g DW to 16.20  
450 µmol/g DW) (Figure 5, Supplementary Table 8). The next abundant aliphatic compounds in  
451 the seeds were gluconapin and glucobrassicinapin. While glucobrassicinapin levels were  
452 drastically reduced by 87% from 5.26 µmol/g DW in the Express617 controls DW to  
453 0.64 µmol/g DW in the double mutants, the gluconapin content was not significantly reduced.  
454 The minor aliphatic compound epiprogoitrin, whose synthesis starts from gluconapin, was  
455 reduced by 51% (0.57 µmol/g DW) in the double mutants compared to Express617

456 (1.17  $\mu\text{mol/g DW}$ ). The remaining seed GSLs analyzed did not exceed 3  $\mu\text{mol/g DW}$ . Out of  
 457 the 28  $\mu\text{mol/g DW}$  reduction observed in the total seed GSL content of double mutants, the  
 458 three major aliphatic GSLs accounted for 86% (24  $\mu\text{mol/g DW}$ ) of the total reduction. In the  
 459 *BnCYP79F1* F<sub>2</sub> double mutants, the progoitrin content was 32.4% lower than in Express617  
 460 (36.32  $\mu\text{mol/g DW}$  compared to 24.5  $\mu\text{mol/g DW}$ ) (Figure 5, Supplementary Table 9). The  
 461 glucobrassicinapin content was not altered in the *BnCYP79F1* double mutants. However, a  
 462 30.4% decrease in gluconapin content suggests that the *BnCYP79F1* mutations might have a  
 463 bigger effect on the synthesis of short-chained 4C aliphatic than on the 5C aliphatic GSLs.

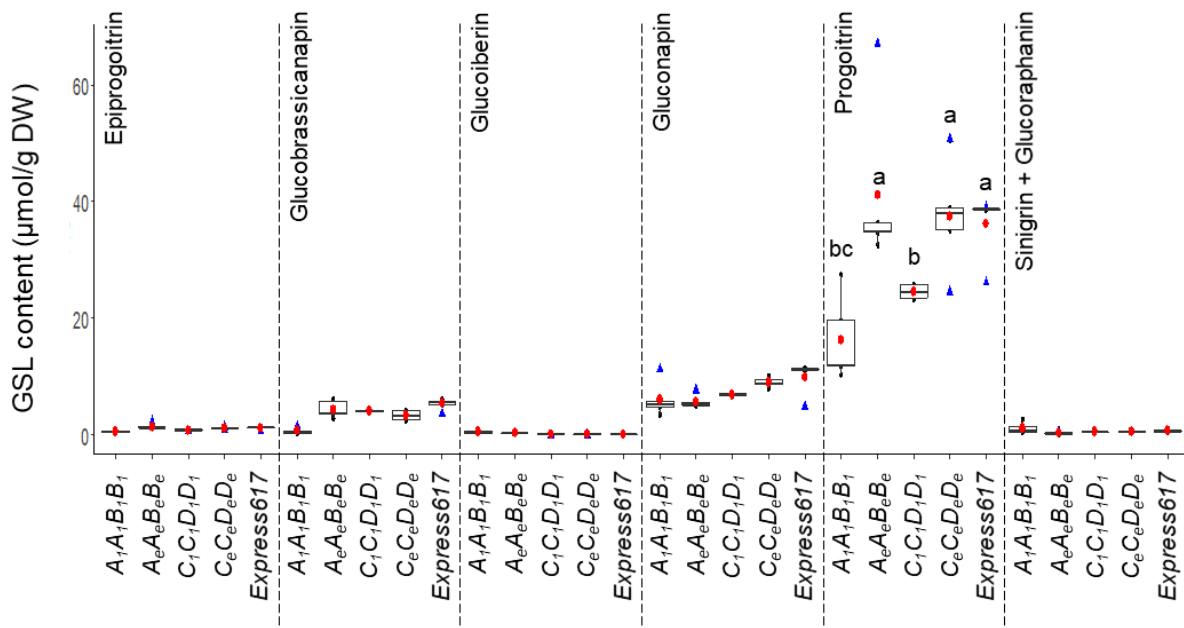

464

465 **Figure 5:** Analysis of aliphatic glucosinolates in mature seeds of *BnMYB28* and *BnCYP79F1* mutants. Individual  
 466 aliphatic GSLs in homozygous F<sub>2</sub> *BnMYB28* (genotype A<sub>1</sub>A<sub>1</sub>B<sub>1</sub>B<sub>1</sub>, seed code 200527) and *BnCYP79F1* (genotype  
 467 C<sub>1</sub>C<sub>1</sub>D<sub>1</sub>D<sub>1</sub>, seed code 200529) double mutants originating from M<sub>3</sub>xM<sub>3</sub> crosses. F<sub>2</sub> plants homozygous for the  
 468 wildtype alleles (A<sub>e</sub>A<sub>e</sub>B<sub>e</sub>B<sub>e</sub> and C<sub>e</sub>C<sub>e</sub>D<sub>e</sub>D<sub>e</sub>) and non-mutated Express617 were used as controls. Aliphatic GSLs  
 469 were identified and quantified using HPLC. The content was calculated as  $\mu\text{mol/g}$  dry weight (DW). Individual  
 470 and mean values are marked in black and red dots, respectively. Blue triangles represent outliers. Error bars  
 471 represent the standard error of the mean from biological replicates. An ANOVA test ( $p < 0.05$ ) was performed  
 472 and significant differences between groups were calculated by a Tukey test ( $p < 0.05$ ). Different alphabets (a-e)  
 473 above error bars represent groups based on significance. All genotypes are as per designated allele codes given  
 474 in Table 2. n.d.: not detectable.

## 475 Discussion

476 Major anti-nutritive compounds like GSLs in the RSM pose a challenge for utilization as  
 477 animal feed. Therefore, a major breeding goal is a reduction of the seed glucosinolate content  
 478 (SGC) to an acceptable limit of  $<18 \mu\text{mol/g}$  dry weight. This study aimed to reduce the  
 479 aliphatic GSL content in seeds by knocking out *BnMYB28* and *BnCYP79F1* genes involved in  
 480 the biosynthesis of aliphatic GSLs in rapeseed. We demonstrate that independent knock-out  
 481 mutants of the two genes possessed significantly reduced total and aliphatic GSLs, primarily  
 482 progoitrin, in the seeds.

483 We targeted the aliphatic GSL biosynthesis pathway since the aliphatic profile comprises up  
 484 to 92% of all GSLs reported from rapeseed<sup>[9]</sup>. Moreover, major GSLs such as progoitrin that  
 485 have adverse metabolic effects in animals belong to the aliphatic profile<sup>[47; 6; 16]</sup>. We reasoned

486 that functional mutations in genes involved in the secondary modification of GSLs might only  
487 confer an altered GSL profile and not a significant reduction in the overall content. Therefore,  
488 we selected *BnMYB28* and *BnCYP79F1* due to their prominent role in the core structure  
489 formation of aliphatic GSLs <sup>[25; 18]</sup>. In *Arabidopsis*, a transcriptome study confirmed the role  
490 of sub-group 12 R2R3 MYB transcription factors in up-regulating almost all genes involved  
491 in the core structure formation of aliphatic GSLs <sup>[19]</sup>. In associative transcriptomics and QTL  
492 mapping studies, former studies have found *MYB28* and *CYP79F1* to be strongly associated  
493 with a high aliphatic GSL content in rapeseed <sup>[48; 49]</sup>. More recently, Kittipol et al. (2019) and  
494 Liu et al. (2020) have also identified *MYB28* as a significant gene controlling aliphatic GSL  
495 content in rapeseed using transcriptome and genome-wide association studies, respectively.

496 It has been demonstrated that the biosynthesis of GSLs occurs in vegetative parts, especially  
497 in rosette leaves and silique walls <sup>[50]</sup>. Using histochemical analyses in *Arabidopsis*, Reintanz  
498 et al. (2001) have demonstrated that the activity of the biosynthesis gene *CYP79F1* is  
499 restricted to the silique walls, and almost untraceable expression levels were observed in the  
500 seeds. Moreover, *in silico* microarray analyses have shown that the expression of the  
501 *CYP79F1* and the *MYB28* transcription factors in *Arabidopsis* seeds was insignificant <sup>[51]</sup>. The  
502 negligible expression levels of genes involved in the chain elongation and GSL core-structure  
503 formation steps in seeds strongly suggest their inability for the *de novo* synthesis of GSLs <sup>[51]</sup>.  
504 Our expression analyses for *BnMYB28* and *BnCYP79F1* paralogs encompass seed setting and  
505 loading phases between 15-45 days after pollination (DAP). In our study, the expression  
506 profiles observed for the two biosynthesis genes complement previous studies since  
507 expression levels were significantly higher in leaves than seeds. *BnMYB28* paralogs were  
508 expressed thousand fold higher in the leaves. Relative expression levels increased during the  
509 early growth stages (15 DAP) with a gradual decrease as the plant approached maturity (45  
510 DAP). This was expected since GSL biosynthesis increases as the plant transitions from the  
511 vegetative to the generative phase <sup>[52; 18]</sup>. In *Arabidopsis*, Brown et al. (2003) have  
512 demonstrated that towards maturity, the reduction in leaf GSL content is concurrent with an  
513 increasing GSL content in the seeds. *BnMYB28.C09* showed the most significant expression  
514 levels over other gene copies in the leaves. In previous mapping studies, QTL significantly  
515 associated with high aliphatic GSL content in leaves and seeds of rapeseed were linked to  
516 *BnMYB28* on chromosome C09 <sup>[53; 29; 49; 54]</sup>. Although *BnMYB28.Cnn* showed higher relative  
517 expression than other paralogs in seeds towards maturity, its levels were in trace amounts.  
518 Moreover, its expression in leaves was undetectable. Since GSL biosynthesis is absent in  
519 seeds, we reason that the expression levels of *BnMYB28.Cnn* are too low to affect the seed  
520 GSL content. Most genes involved in aliphatic GSL biosynthesis, including *CYP79F1*, are  
521 under the transcriptional control of *MYB28* <sup>[19]</sup>. This was evident since a significantly high  
522 relative expression of *BnMYB28.C09* at 15 DAP was followed by a significant increase in  
523 *BnCYP79F1.C05* expression levels in the leaves at 25 DAP. Based on these data, we reasoned  
524 paralogs *BnMYB28.C09* and *BnCYP79F1.C05* as our most promising candidates for  
525 functional analyses due to their significant expression levels in leaves, the primary site for  
526 GSL biosynthesis. However, due to the high functional redundancy in the polyploid rapeseed  
527 genome, we cannot wholly rely on single mutants of highly expressed paralogs for significant  
528 phenotypic effects. Therefore, we also considered *BnMYB28.A03* and *BnCYP79F1.A06* for  
529 pyramiding functional mutants for enhanced phenotypic effects.

530 Former studies demonstrating EMS-induced random mutagenesis in Brassicaceae crops have  
531 reported a wide range of mutation frequencies between 1/12 kb to 1/447 kb <sup>[55; 56; 57; 34; 58; 59]</sup>.  
532 In this work, we screened the EMS-mutagenized population of the winter rapeseed  
533 ‘Express617’ developed by Harloff et al. (2012). Past studies on this resource have estimated  
534 varying mutation frequencies of 1/24 kb – 1/72 kb <sup>[41; 42; 43; 44; 45; 46]</sup>. This variation is expected



535 since frequency estimations depend on factors like the length of amplicons screened, the GC  
536 content within amplified fragments, and the number of pools screened for mutant detection.  
537 We estimated an average mutation frequency of 1/52.4 kb for *BnMYB28* and 1/34.7 kb for  
538 *BnCYP79F1*, which is well within the frequencies expected from this mutant population.

539 The functionality of *R2R3 MYB* transcription factors is determined by the DNA binding R2  
540 and R3 domains and a nuclear localization signal [60; 18]. We detected EMS-induced nonsense  
541 mutations within the conserved R2 domain in the first exons of *BnMYB28.C09* and  
542 *BnMYB28.A03*. Since both premature nonsense mutations were located in the R2 conserved  
543 domain, consequent transcripts are expected to lack the downstream R3 DNA binding and the  
544 vital NLS domains. For both single mutants, >95% of the resultant protein sequence is  
545 expected to be truncated. Therefore, we anticipate a complete loss-of-function of the  
546 *BnMYB28* transcription factor in selected mutants.

547 Within *BnCYP79F1.A06*, only missense mutations were found. A lack of nonsense mutations  
548 could be due to two reasons. First, the paralog-specific primers encompassed only 38% of the  
549 total cDNA sequence. Second, the amplicon possessed only five possible amino acid motifs  
550 with the possibility of converting to stop codons after the EMS-induced C→T or G→A  
551 transitions. Since we observed a nearly undetectable gene expression for *BnCYP79F1.A06* in  
552 the leaves compared to *BnCYP79F1.C05*, we speculate that its role in the biosynthesis process  
553 is less critical. Moreover, associative transcriptomics studies have reported *BnCYP79F1.C05*  
554 to be significantly correlated with the aliphatic GSL content in rapeseed [30].

555 Based on functional studies from *Arabidopsis* [25; 18] and *Brassica* crops [21; 22; 24; 27; 28], we  
556 expected that a knock-out of the two genes would severely influence the biosynthesis of short-  
557 chained aliphatic GSLs, especially progoitrin that accounts for ~80% of all GSLs in the seeds  
558 [3]. Since progoitrin is also the most abundant seed GSL type in rapeseed [9], we anticipated  
559 significant changes in the mutants. In this regard, a more significant effect from *BnMYB28*  
560 mutants was expected due to its central regulatory control over the aliphatic GSL biosynthesis  
561 [18; 19]. Therefore, a knock-out of the *BnMYB28* is expected to downregulate several genes  
562 involved in the biosynthesis process. For validation, we suggest to analyze the expression of  
563 major downstream targets in *BnMYB28* double mutants, e.g., *MAM3* [61], which is involved in  
564 chain elongation and *CYP79F1*, *CYP79F2* [26], and *CYP83A1* [62] involved in the core structure  
565 formation. The mutants selected here are suitable for studying the role of *BnMYB28* as the  
566 ‘master regulator’ of the entire aliphatic GSL biosynthesis process in rapeseed.

567 Regarding *BnCYP79F1.A06*, only a missense mutation was available where a glutamic acid is  
568 replaced by a lysine. Therefore, a weaker phenotypic effect from the *BnCYP79F1* mutations  
569 can be explained by a putative compensation effect of *BnCYP79F1.A06*. Since *CYP79F1* can  
570 metabolize short and long-chained aliphatic GSLs in *Arabidopsis* [26], a possible sub-  
571 functionalization in the *B. napus* paralogs could explain the distinct functions of  
572 *BnCYP79F1.C05* and *BnCYP79F1.A06*. We speculate that *BnCYP79F1.A06* has a more  
573 significant impact on the C5 GSL metabolism than C4 aliphatic GSLs. This is because the  
574 sole knock-out of the *BnCYP79F1.C05* paralog in the *BnCYP79F1* double mutants resulted in  
575 significant reductions in the short-chained C4 aliphatic GSL progoitrin, whereas the C5  
576 glucobrassicinapin content was not significantly reduced. For confirmation, functional  
577 analyses of *BnCYP79F1* knock-out mutants for both paralogs are needed.

578 It is known that the vegetative parts, especially the leaves are a major site for GSL  
579 biosynthesis. Although expression of biosynthesis genes is higher in vegetative parts, the  
580 seeds show a higher accumulation of GSLs in *Brassica* oilseeds since they are important sink

581 tissues for GSLs in *Brassica* oil crops <sup>[63]</sup>. Similarly, we observed a significantly higher GSL  
582 content in the seeds compared to the leaves. While this observation is in line with previous  
583 studies <sup>[52; 9; 51]</sup>, it raises the question as to why GSL levels remain low and mostly unchanged  
584 in the leaves even in the mutants. Firstly, since the GSL content was already very low in the  
585 leaves, we did not observe any statistically significant reductions in the mutants. Secondly, we  
586 reason that the knock-out mutations in biosynthesis genes *BnMYB28* and *BnCYP79F1*  
587 described in this study confer restricted aliphatic GSL biosynthesis in the leaves. However,  
588 we speculate that a more significant phenotypic effect is realized in the seeds due to the  
589 subsequent activity of putative seed-specific GSL transporters <sup>[63; 64]</sup>.

590 In conclusion, our study demonstrates the function of two major genes involved in the  
591 biosynthesis of aliphatic GSLs, the most abundant GSL class in rapeseed. Our results provide  
592 the first functional analysis by knock-out of *BnMYB28* and *BnCYP79F1* genes in rapeseed.  
593 Mutants described in this study displayed significant reductions in the seed aliphatic GSL  
594 content that is well within commercial standards. In the future, investigating regulatory shifts  
595 in the complex GSL biosynthesis process and the seed-specific transport of GSLs could be  
596 crucial for achieving further GSL reduction. Our study provides a strong and promising basis  
597 for breeding rapeseed with improved meal quality in the future.

## 598 **Acknowledgments**

599 We thank Monika Bruisch and Brigitte Neidhardt-Olf for their assistance in greenhouse  
600 experiments. We acknowledge the support provided by Jens Hermann and Prof. Dr. Wolfgang  
601 Bilger from the Department of Ecophysiology of Plants in Kiel for HPLC analytics. We also  
602 thank the Institute of Clinical Molecular Biology in Kiel for providing Sanger sequencing  
603 services. This work was financially supported by the Federal Ministry of Education and  
604 Research (BMBF) within the project IRFFA: Improved Rapeseed as Fish Feed in Aquaculture  
605 (grant number 031B0357B).

## 606 **Author Contributions**

607 SJ, HJH and CJ designed the research. SJ conducted the experiments and analyzed the data.  
608 CW, MB and DT provided support for the qualitative assessment of glucosinolates. HJH and  
609 CJ supervised the research. SJ wrote the original draft. HJH, AA, MB, CW, DT and CJ  
610 reviewed and edited the manuscript. All authors participated in the discussion and revision of  
611 the manuscript. The authors read and approved the final manuscript.

## 612 **Data availability statement**

613 The authors declare that data supporting the finding of this study are available from this  
614 manuscript and its supplementary information files. Extra data, information, and plant  
615 materials used/produced in this study are available from the corresponding author upon  
616 request.

## 617 **Additional Information**

### 618 **Competing Interests Statement**

619 AA is employed by NPZ Innovation GmbH, Germany. The remaining authors declare that the  
620 research was conducted in the absence of any commercial or financial relationships and  
621 declare no competing interests.

## 622 Funding

623 This work was funded by the Federal Ministry of Education and Research (BMBF) within the  
624 framework of the project IRFFA: Improved Rapeseed as Fish Feed in Aquaculture (grant  
625 number 031B0357B).

## 626 References

- 627
- 628 1. Russo, M., Yan, F., Stier, A., Klasen, L., & Honermeier, B. (2021). Erucic acid  
629 concentration of rapeseed (*Brassica napus* L.) oils on the German food retail market.  
630 *Food Science & Nutrition*, 9(7), 3664-3672.
  - 631 2. Bourdon, D., & Aumaître, A. (1990). Low-glucosinolate rapeseeds and rapeseed  
632 meals: effect of technological treatments on chemical composition, digestible energy  
633 content and feeding value for growing pigs. *Animal Feed Science and Technology*,  
634 30(3), 175-191. doi:[https://doi.org/10.1016/0377-8401\(90\)90014-Y](https://doi.org/10.1016/0377-8401(90)90014-Y)
  - 635 3. Halkier, B. A., & Du, L. (1997). The biosynthesis of glucosinolates. *Trends in Plant*  
636 *Science*, 2(11), 425-431.
  - 637 4. Sønderby, I. E., Geu-Flores, F., & Halkier, B. A. (2010). Biosynthesis of  
638 glucosinolates—gene discovery and beyond. *Trends in Plant Science*, 15(5), 283-290.
  - 639 5. Blažević, I., Montaut, S., Burčul, F., Olsen, C. E., Burow, M., Rollin, P., & Agerbirk,  
640 N. (2020). Glucosinolate structural diversity, identification, chemical synthesis and  
641 metabolism in plants. *Phytochemistry*, 169, 112100.
  - 642 6. Fahey, J. W., Zalcmann, A. T., & Talalay, P. (2001). The chemical diversity and  
643 distribution of glucosinolates and isothiocyanates among plants. *Phytochemistry*,  
644 56(1), 5-51.
  - 645 7. Mitreiter, S., & Gigolashvili, T. (2021). Regulation of glucosinolate biosynthesis.  
646 *Journal of Experimental Botany*, 72(1), 70-91.
  - 647 8. Cartea, M. E., & Velasco, P. (2008). Glucosinolates in *Brassica* foods: bioavailability  
648 in food and significance for human health. *Phytochemistry Reviews*, 7(2), 213-229.
  - 649 9. Velasco, P., Soengas, P., Vilar, M., Cartea, M. E., & del Rio, M. (2008). Comparison  
650 of glucosinolate profiles in leaf and seed tissues of different *Brassica napus* crops.  
651 *Journal of the American Society for Horticultural Science*, 133(4), 551-558.
  - 652 10. Wittkop, B., Snowdon, R., & Friedt, W. (2009). Status and perspectives of breeding  
653 for enhanced yield and quality of oilseed crops for Europe. *Euphytica*, 170(1), 131-  
654 140.
  - 655 11. Kondra, Z., & Stefansson, B. (1970). Inheritance of the major glucosinolates of  
656 rapeseed (*Brassica napus*) meal. *Canadian Journal of Plant Science*, 50(6), 643-647.
  - 657 12. Andréasson, E., Jørgensen, L. B., Höglund, A.-S., Rask, L., & Meijer, J. (2001).  
658 Different myrosinase and idioblast distribution in *Arabidopsis* and *Brassica napus*.  
659 *Plant Physiology*, 127(4), 1750-1763. doi:10.1104/pp.010334

- 660 13. Rask, L., Andréasson, E., Ekbom, B., Eriksson, S., Pontoppidan, B., & Meijer, J.  
661 (2000). Myrosinase: gene family evolution and herbivore defense in Brassicaceae.  
662 *Plant Molecular Biology*, 42(1), 93-114.
- 663 14. Madloo, P., Lema, M., Francisco, M., & Soengas, P. (2019). Role of Major  
664 Glucosinolates in the Defense of Kale Against *Sclerotinia sclerotiorum* and  
665 *Xanthomonas campestris* pv. *campestris*. *Phytopathology*, 109(7), 1246-1256.
- 666 15. Kaiser, F., Harloff, H. J., Tressel, R. P., Kock, T., & Schulz, C. (2021). Effects of  
667 highly purified rapeseed protein isolate as fishmeal alternative on nutrient digestibility  
668 and growth performance in diets fed to rainbow trout (*Oncorhynchus mykiss*).  
669 *Aquaculture Nutrition*, 27(5), 1352-1362.
- 670 16. Tripathi, M., & Mishra, A. (2007). Glucosinolates in animal nutrition: A review.  
671 *Animal Feed Science and Technology*, 132(1-2), 1-27.
- 672 17. Keck, A.-S., & Finley, J. W. (2004). Cruciferous vegetables: cancer protective  
673 mechanisms of glucosinolate hydrolysis products and selenium. *Integrative Cancer*  
674 *Therapies*, 3(1), 5-12.
- 675 18. Gigolashvili, T., Yatusevich, R., Berger, B., Müller, C., & Flügge, U. I. (2007). The  
676 R2R3-MYB transcription factor *HAG1/MYB28* is a regulator of methionine-derived  
677 glucosinolate biosynthesis in *Arabidopsis thaliana*. *The Plant Journal*, 51(2), 247-261.
- 678 19. Hirai, M. Y., Sugiyama, K., Sawada, Y., Tohge, T., Obayashi, T., Suzuki, A., Araki,  
679 R., Sakurai, N., Suzuki, H., & Aoki, K. (2007). Omics-based identification of  
680 *Arabidopsis Myb* transcription factors regulating aliphatic glucosinolate biosynthesis.  
681 *Proceedings of the National Academy of Sciences*, 104(15), 6478-6483.
- 682 20. Yin, L., Chen, H., Cao, B., Lei, J., & Chen, G. (2017). Molecular characterization of  
683 MYB28 involved in aliphatic glucosinolate biosynthesis in Chinese kale (*Brassica*  
684 *oleracea* var. *alboglabra* Bailey). *Frontiers in Plant Science*, 8, 1083.
- 685 21. Bisht, N. C., Gupta, V., Ramchiary, N., Sodhi, Y., Mukhopadhyay, A., Arumugam,  
686 N., Pental, D., & Pradhan, A. (2009). Fine mapping of loci involved with  
687 glucosinolate biosynthesis in oilseed mustard (*Brassica juncea*) using genomic  
688 information from allied species. *Theoretical and Applied Genetics*, 118(3), 413-421.
- 689 22. Augustine, R., Majee, M., Gershenzon, J., & Bisht, N. C. (2013). Four genes encoding  
690 MYB28, a major transcriptional regulator of the aliphatic glucosinolate pathway, are  
691 differentially expressed in the allopolyploid *Brassica juncea*. *Journal of Experimental*  
692 *Botany*, 64(16), 4907-4921. doi:10.1093/jxb/ert280
- 693 23. Yang, J., Wang, J., Li, Z., Li, X., He, Z., Zhang, L., Sha, T., Lyu, X., Chen, S., & Gu,  
694 Y. (2021). Genomic signatures of vegetable and oilseed allopolyploid *Brassica juncea*  
695 and genetic loci controlling the accumulation of glucosinolates. *Plant Biotechnology*  
696 *Journal*, 19(12), 2619-2628.
- 697 24. Kim, Y. B., Li, X., Kim, S.-J., Kim, H. H., Lee, J., Kim, H., & Park, S. U. (2013).  
698 MYB transcription factors regulate glucosinolate biosynthesis in different organs of  
699 Chinese cabbage (*Brassica rapa* ssp. *pekinensis*). *Molecules*, 18(7), 8682-8695.

- 700 25. Reintanz, B., Lehnen, M., Reichelt, M., Gershenzon, J., Kowalczyk, M., Sandberg, G.,  
701 Godde, M., Uhl, R., & Palme, K. (2001). bus, a bushy *Arabidopsis CYP79F1*  
702 knockout mutant with abolished synthesis of short-chain aliphatic glucosinolates. *The*  
703 *Plant Cell*, 13(2), 351-367.
- 704 26. Chen, S., Glawischnig, E., Jørgensen, K., Naur, P., Jørgensen, B., Olsen, C. E.,  
705 Hansen, C. H., Rasmussen, H., Pickett, J. A., & Halkier, B. A. (2003). *CYP79F1* and  
706 *CYP79F2* have distinct functions in the biosynthesis of aliphatic glucosinolates in  
707 *Arabidopsis*. *The Plant Journal*, 33(5), 923-937.
- 708 27. Sharma, M., Mukhopadhyay, A., Gupta, V., Pental, D., & Pradhan, A. K. (2016).  
709 *BjuB.CYP79F1* regulates synthesis of propyl fraction of aliphatic glucosinolates in  
710 oilseed mustard *Brassica juncea*: functional validation through genetic and transgenic  
711 approaches. *PLoS One*, 11(2), e0150060.
- 712 28. Li, Z., Liu, Y., Li, L., Fang, Z., Yang, L., Zhuang, M., Zhang, Y., & Lv, H. (2019).  
713 Transcriptome reveals the gene expression patterns of sulforaphane metabolism in  
714 broccoli florets. *PLoS One*, 14(3), e0213902.
- 715 29. Harper, A. L., Trick, M., Higgins, J., Fraser, F., Clissold, L., Wells, R., Hattori, C.,  
716 Werner, P., & Bancroft, I. (2012). Associative transcriptomics of traits in the  
717 polyploid crop species *Brassica napus*. *Nature Biotechnology*, 30(8), 798-802.
- 718 30. Kittipol, V., He, Z., Wang, L., Doheny-Adams, T., Langer, S., & Bancroft, I. (2019).  
719 Genetic architecture of glucosinolate variation in *Brassica napus*. *Journal of Plant*  
720 *Physiology*, 240, 152988. doi:<https://doi.org/10.1016/j.jplph.2019.06.001>
- 721 31. Lu, K., Wei, L., Li, X., Wang, Y., Wu, J., Liu, M., Zhang, C., Chen, Z., Xiao, Z., &  
722 Jian, H. (2019). Whole-genome resequencing reveals *Brassica napus* origin and  
723 genetic loci involved in its improvement. *Nature Communications*, 10(1), 1154.
- 724 32. Wei, D., Cui, Y., Mei, J., Qian, L., Lu, K., Wang, Z.-M., Li, J., Tang, Q., & Qian, W.  
725 (2019). Genome-wide identification of loci affecting seed glucosinolate contents in  
726 *Brassica napus* L. *Journal of Integrative Plant Biology*, 61(5), 611-623.  
727 doi:10.1111/jipb.12717
- 728 33. Liu, S., Huang, H., Yi, X., Zhang, Y., Yang, Q., Zhang, C., Fan, C., & Zhou, Y.  
729 (2020). Dissection of genetic architecture for glucosinolate accumulations in leaves  
730 and seeds of *Brassica napus* by genome-wide association study. *Plant Biotechnology*  
731 *Journal*, 18(6), 1472-1484.
- 732 34. Harloff, H.-J., Lemcke, S., Mittasch, J., Frolov, A., Wu, J. G., Dreyer, F., Leckband,  
733 G., & Jung, C. (2012). A mutation screening platform for rapeseed (*Brassica napus*  
734 L.) and the detection of sinapine biosynthesis mutants. *Theoretical and Applied*  
735 *Genetics*, 124(5), 957-969.
- 736 35. Saghai-Marooif, M. A., Soliman, K. M., Jorgensen, R. A., & Allard, R. (1984).  
737 Ribosomal DNA spacer-length polymorphisms in barley: Mendelian inheritance,  
738 chromosomal location, and population dynamics. *Proceedings of the National*  
739 *Academy of Sciences*, 81(24), 8014-8018.

- 740 36. Till, B. J., Zerr, T., Comai, L., & Henikoff, S. (2006). A protocol for TILLING and  
741 Ecotilling in plants and animals. *Nature Protocols*, 1(5), 2465.
- 742 37. Zerr, T., & Henikoff, S. (2005). Automated band mapping in electrophoretic gel  
743 images using background information. *Nucleic Acids Research*, 33(9), 2806-2812.
- 744 38. Fiebig, H., & Arens, M. (1992). Glucosinolate (HPLC-Methode) -  
745 Gemeinschaftsarbeiten der DGF, 128. Mitteilung: Deutsche Einheitsmethoden zur  
746 Untersuchung von Fetten, Fettprodukten, Tensiden und verwandten Stoffen, 98. Mitt.:  
747 Analyse von Fettrohstoffen XII\*. 12. *Fett Wissenschaft Technologie*, 94, 199-203.
- 748 39. Stefanucci, A., Zengin, G., Llorent-Martinez, E. J., Dimmito, M. P., Della Valle, A.,  
749 Pieretti, S., Ak, G., Sinan, K. I., & Mollica, A. (2020). Chemical characterization,  
750 antioxidant properties and enzyme inhibition of Rutabaga root's pulp and peel  
751 (*Brassica napus* L.). *Arabian Journal of Chemistry*, 13(9), 7078-7086.
- 752 40. Dubos, C., Stracke, R., Grotewold, E., Weisshaar, B., Martin, C., & Lepiniec, L.  
753 (2010). *MYB* transcription factors in *Arabidopsis*. *Trends in Plant Science*, 15(10),  
754 573-581.
- 755 41. Guo, Y., Harloff, H.-J., Jung, C., & Molina, C. (2014). Mutations in single *FT*-and  
756 *TFL1*-paralogs of rapeseed (*Brassica napus* L.) and their impact on flowering time and  
757 yield components. *Frontiers in Plant Science*, 5, 282.
- 758 42. Emrani, N., Harloff, H.-J., Gudi, O., Kopisch-Obuch, F., & Jung, C. (2015). Reduction  
759 in sinapine content in rapeseed (*Brassica napus* L.) by induced mutations in sinapine  
760 biosynthesis genes. *Molecular Breeding*, 35(1), 37. doi:10.1007/s11032-015-0236-2
- 761 43. Braatz, J., Harloff, H.-J., Emrani, N., Elisha, C., Heepe, L., Gorb, S. N., & Jung, C.  
762 (2018). The effect of *INDEHISCENT* point mutations on silique shatter resistance in  
763 oilseed rape (*Brassica napus*). *Theoretical and Applied Genetics*, 131(4), 959-971.
- 764 44. Shah, S., Karunarathna, N. L., Jung, C., & Emrani, N. (2018). An *APETALA1* ortholog  
765 affects plant architecture and seed yield component in oilseed rape (*Brassica napus*  
766 L.). *BMC Plant Biology*, 18(1), 380. doi:10.1186/s12870-018-1606-9
- 767 45. Sashidhar, N., Harloff, H. J., & Jung, C. (2019). Identification of phytic acid mutants  
768 in oilseed rape (*Brassica napus*) by large scale screening of mutant populations  
769 through amplicon sequencing. *New Phytologist*, 225(5), 2022-2034.
- 770 46. Karunarathna, N. L., Wang, H., Harloff, H. J., Jiang, L., & Jung, C. (2020). Elevating  
771 seed oil content in a polyploid crop by induced mutations in *SEED FATTY ACID*  
772 *REDUCER* genes. *Plant Biotechnology Journal*, 18(11), 2251-2266.
- 773 47. Fenwick, G. R., & Curtis, R. F. (1980). Rapeseed meal and its use in poultry diets. A  
774 review. *Animal Feed Science and Technology*, 5(4), 255-298.  
775 doi:[https://doi.org/10.1016/0377-8401\(80\)90016-4](https://doi.org/10.1016/0377-8401(80)90016-4)
- 776 48. Feng, J., Long, Y., Shi, L., Shi, J., Barker, G., & Meng, J. (2012). Characterization of  
777 metabolite quantitative trait loci and metabolic networks that control glucosinolate  
778 concentration in the seeds and leaves of *Brassica napus*. *New Phytologist*, 193(1), 96-  
779 108.

- 780 49. Li, F., Chen, B., Xu, K., Wu, J., Song, W., Bancroft, I., Harper, A. L., Trick, M., Liu,  
781 S., & Gao, G. (2014). Genome-wide association study dissects the genetic architecture  
782 of seed weight and seed quality in rapeseed (*Brassica napus* L.). *DNA Research*,  
783 21(4), 355-367.
- 784 50. Toroser, D., Wood, C., Griffiths, H., & Thomas, D. (1995). Glucosinolate biosynthesis  
785 in oilseed rape (*Brassica napus* L.): studies with 35SO<sub>2</sub>-4 and glucosinolate  
786 precursors using oilseed rape pods and seeds. *Journal of Experimental Botany*, 46(7),  
787 787-794.
- 788 51. Nour-Eldin, H. H., & Halkier, B. A. (2009). Piecing together the transport pathway of  
789 aliphatic glucosinolates. *Phytochemistry Reviews*, 8(1), 53-67.
- 790 52. Brown, P. D., Tokuhisa, J. G., Reichelt, M., & Gershenzon, J. (2003). Variation of  
791 glucosinolate accumulation among different organs and developmental stages of  
792 *Arabidopsis thaliana*. *Phytochemistry*, 62(3), 471-481.
- 793 53. Howell, P., Sharpe, A., & Lydiate, D. (2003). Homoeologous loci control the  
794 accumulation of seed glucosinolates in oilseed rape (*Brassica napus*). *Genome*, 46(3),  
795 454-460.
- 796 54. Qu, C.-M., Li, S.-M., Duan, X.-J., Fan, J.-H., Jia, L.-D., Zhao, H.-Y., Lu, K., Li, J.-N.,  
797 Xu, X.-F., & Wang, R. (2015). Identification of candidate genes for seed glucosinolate  
798 content using association mapping in *Brassica napus* L. *Genes*, 6(4), 1215-1229.
- 799 55. Wang, N., Wang, Y., Tian, F., King, G. J., Zhang, C., Long, Y., Shi, L., & Meng, J.  
800 (2008). A functional genomics resource for *Brassica napus*: development of an EMS  
801 mutagenized population and discovery of *FAEI* point mutations by TILLING. *New*  
802 *Phytologist*, 180(4), 751-765.
- 803 56. Himelblau, E., Gilchrist, E. J., Buono, K., Bizzell, C., Mentzer, L., Vogelzang, R.,  
804 Osborn, T., Amasino, R. M., Parkin, I. A., & Haughn, G. W. (2009). Forward and  
805 reverse genetics of rapid-cycling *Brassica oleracea*. *Theoretical and Applied Genetics*,  
806 118(5), 953-961.
- 807 57. Stephenson, P., Baker, D., Girin, T., Perez, A., Amoah, S., King, G. J., & Østergaard,  
808 L. (2010). A rich TILLING resource for studying gene function in *Brassica rapa*.  
809 *BMC Plant Biology*, 10(1), 62.
- 810 58. Gilchrist, E. J., Sidebottom, C. H., Koh, C. S., MacInnes, T., Sharpe, A. G., &  
811 Haughn, G. W. (2013). A mutant *Brassica napus* (Canola) population for the  
812 identification of new genetic diversity via TILLING and next generation sequencing.  
813 *PLoS One*, 8(12), e84303.
- 814 59. Tang, S., Liu, D. X., Lu, S., Yu, L., Li, Y., Lin, S., Li, L., Du, Z., Liu, X., & Li, X.  
815 (2020). Development and screening of EMS mutants with altered seed oil content or  
816 fatty acid composition in *Brassica napus*. *The Plant Journal*, 104(5), 1410-1422.
- 817 60. Stracke, R., Werber, M., & Weisshaar, B. (2001). The R2R3-MYB gene family in  
818 *Arabidopsis thaliana*. *Current Opinion in Plant Biology*, 4(5), 447-456.

- 819 61. Textor, S., De Kraker, J.-W., Hause, B., Gershenzon, J., & Tokuhsa, J. G. (2007).  
820 MAM3 catalyzes the formation of all aliphatic glucosinolate chain lengths in  
821 *Arabidopsis*. *Plant Physiology*, *144*(1), 60-71.
- 822 62. Hemm, M. R., Ruegger, M. O., & Chapple, C. (2003). The *Arabidopsis ref2* Mutant Is  
823 Defective in the Gene Encoding CYP83A1 and Shows Both Phenylpropanoid and  
824 Glucosinolate Phenotypes. *The Plant Cell*, *15*(1), 179-194. doi:10.1105/tpc.006544
- 825 63. Nour-Eldin, H. H., Madsen, S. R., Engelen, S., Jørgensen, M. E., Olsen, C. E.,  
826 Andersen, J. S., Seynnaeve, D., Verhoye, T., Fulawka, R., Denolf, P., & Halkier, B. A.  
827 (2017). Reduction of antinutritional glucosinolates in *Brassica* oilseeds by mutation of  
828 genes encoding transporters. *Nature Biotechnology*, *35*, 377.
- 829 64. Nambiar, D. M., Kumari, J., Augustine, R., Kumar, P., Bajpai, P. K., & Bisht, N. C.  
830 (2021). *GTR1* and *GTR2* transporters differentially regulate tissue-specific  
831 glucosinolate contents and defence responses in the oilseed crop *Brassica juncea*.  
832 *Plant, Cell & Environment*, *44*(8) 2729-2743.

833
